# Supplementary material
Source: PubMed Central journal article supplement (PMC2449352)
Supplement: 0800388105_Supplemental_PDF.pdf [file 0800388105_Supplemental_PDF.pdf]

# Supporting Information

Kozmik et al. 10.1073/pnas.0800388105

## Materials and Methods

**Jellyfish Collection and Culture.** Adult *Tripedalia cystophora* were collected in mangroves of La Parguerra, Puerto Rico. Laboratory cultures were established using settling larvae and artificial sea water. Settled larvae metamorphosed into young polyps. Young polyps were transformed into budding (asexually reproducing) polyps by feeding with artemia once a week. Spontaneously metamorphosed polyps (newborn medusae) were fixed for *in situ* hybridization. Polyps as well as young medusae were maintained at 26°C.

**Isolation of Rhopalium-Expressed Genes.** The expressed sequence tag (EST) cDNA library was generated from rhopalia mRNA by using pBluescript II. Individual clones from the library were sequenced using an ABI capillary sequencer, and full-length cDNAs were obtained by SMART RACE (BD Biosciences). A fragment of *Tripedalia* Mitf cDNA was isolated by reverse transcription-PCR of rhopalia mRNA by using degenerate primers zk665A 5'-AARAARGAYAAAYCAYAA-3' and zk665F 5'-TTDATNCKRTRCTTDTATRTT-3'. The resulting partial Mitf cDNA was extended by RACE. The accession numbers for the clones are as follows: *c-opsin* (EU310498), *oca* (EU310502), *mitf* (EU310499), catalytic *pde* (EU310500), inhibitory *pde6d* (EU310501), and guanylate cyclase (EU310503).

**Phylogenetic Analysis.** Amino acid alignment created by MUSCLE software (11) with default settings was edited manually, and highly divergent stretches were excluded. The phylogenetic trees were constructed using the Phylip 3.6 package. Bootstrap sample set was generated by SEQBOOT (1,000 replicates), protein distances were estimated using PROTDIST (PAM matrix, 1,000 datasets), and the NJ tree was constructed by NEIGHBOR (1,000 replicates, random input order) and CONSENSE programs. Maximum-likelihood trees were constructed by PROML (JTT matrix, random input order, 500 replicates) and final consensus tree by CONSENSE. The numbers above each node represent the percentage of bootstrap probability based on 1,000 replicates. *Tripedalia* protein sequences clustered consistently in trees inferred by the maximum-likelihood method. Accession numbers of sequences used in the trees are as follows.

**Opsin tree.** The numbers of *Strongylocentrotus purpuratus* genes represent the gene ID in public assembly of Sea Urchin Genome Project ([hgsc.bcm.tmc.edu/projects/seaurchin](http://hgsc.bcm.tmc.edu/projects/seaurchin)). Gallus adenosine receptor NP\_990418.1, *Mus* serotonin receptor NP\_766400.1, *Branchiostoma belcheri* opsin 6 BAC76024.1, *Drosophila* Rh6 NP\_524368.3, *Drosophila* Rh2 NP\_524398.1, *Drosophila* Rh3 NP\_524411.1, *Apis* blue rhodopsin NP\_001011606.1, *Octopus* opsin P09241, *Sepia* rhodopsin AAC26329.1, *Mizuhopecten* Gq O15973, *Platynereis* r-opsin CAC86665.1, *B. belcheri* Mop Q4R114, *Xenopus* melanopsin AAC41235.1, *Danio* melanopsin NP\_840074.1, *Homo* melanopsin NP\_150598.1, *Danio* LW NP\_571250.1, *Homo* MW NP\_000504.1, *Gallus* LW NP\_990740.1, *Homo* rhodopsin NP\_000530.1, *Danio* extraocular NP\_571287.1, *Danio* MW4 NP\_571329.1, *Latimeria* Rh2 AAD30520.1, *Danio* SW opsin NP\_571394.1, *Xenopus* violet P51473, *Xenopus* green AAO38746.1, *Gallus* blue NP\_990848.1, *Salmo* VAL opsin O13018, *Danio* VAL opsin NP\_571661.1, *Ciona* opsin NP\_001027727.1, *Xenopus* parapsinopsin NP\_998830.1, *Uta* parietopsin AAZ79904.1, *Xenopus* parietopsin NP\_001039256.1, *Mus* encephalopsin NP\_034228.1, *Homo* encephalopsin NP\_055137.2, *Platynereis* c-opsin AAV63834.1, *Takifugu* TMT NP\_001027778.1, *B. belcheri* opsin 4 BAC76021.1, *B. belcheri*

opsin 5 BAC76022.1, *Apis* pteropsin NP\_001035057.1, *Aedes* opsin EAT43163.1, *Anopheles* GPRop11 XP\_312503.3, *Anopheles* GPRop12 XP\_312502.2, *Strongylocentrotus* Sp1 GLEAN3.05569, *Mizuhopecten* Gq O15974, *B. belcheri* opsin 2 BAC76020.1, *B. belcheri* opsin 1 BAC76019.1, *Strongylocentrotus* Sp3.2 GLEAN3.27633, *Strongylocentrotus* Sp3.1 GLEAN3.27634, *Rattus* Opn5 NP\_861437.1, *Homo* Opn5 NP\_859528.1, *Homo* peropsin NP\_006574.1, *Mus* peropsin AAC53344.1, *B. belcheri* opsin 3 BAC76023.1, *Gallus* RGR NP\_001026387.1, *Mus* RGR NP\_067315.1, *Todarodes* retinochrome CAA40422.1.

**MITF/TFE tree.** *Saccharomyces cerevisiae* RTG3 NP\_009447.1, *Caenorhabditis briggsae* XP\_001671854.1, *Caenorhabditis elegans* NP\_500461.1, *Nematostella vectensis* XP\_001636474.1, *Ciona intestinalis* NP\_001087207.1, *Apis mellifera* XP\_394278.2, *Drosophila melanogaster* AAQ01726.1, *Mus musculus* TfeB NP\_035679.2, *Homo sapiens* TfeB NP\_009093.1, *M. musculus* Tfe3 NP\_766060.2, *H. sapiens* Tfe3 NP\_006512.2, *Danio rerio* Tfe3 CAE30419.1, *D. rerio* TfeC CAH68937.1, *H. sapiens* TfeC NP\_036384.1, *M. musculus* TfeC NP\_112475.1, *D. rerio* MiTF NP\_570998.1, *M. musculus* MiTF AAI08978.1, *Canis lupus familiaris* MiTF NP\_001003337.1, *H. sapiens* MiTF NP\_006713.1, *Xenopus tropicalis* MiTF NP\_001093747.1, *Gallus gallus* NP\_990360.1.

**Catalytic PDE tree.** *H. sapiens* PDE1A P54750, *Strongylocentrotus purpuratus* PDE5 NP\_001029121.1, *H. sapiens* PDE5A (NP\_001074), *D. melanogaster* PDE6 (CG8279-PA) AAF55066, *H. sapiens* PDE1A NP\_005010.2; *S. purpuratus* PDE1 NP\_001091918.1, *H. sapiens* PDE2A NP\_002590.1, *S. cerevisiae* PDE2-like NP\_015005.1, *S. cerevisiae* PDE1 CAA64139.1, *H. sapiens* PDE3A NP\_000912.3, *Rattus norvegicus* PDE3 (predicted) XP\_574187.2, *H. sapiens* PDE4 ANP\_006193.1, *D. melanogaster* PDE4 (CG32498) AAF45865.2, *Nematostella vectensis* PDE5 (predicted) XP\_001631585.1, *H. sapiens* PDE5A1 NP\_001074.2, *D. melanogaster* PDE6 (CG8279-PA) NP\_650369.2, *H. sapiens* PDE6A P16499, *H. sapiens* PDE6B P35913, *H. sapiens* PDE6C P51160, *N. vectensis* PDE6-like XP\_001636689.1, *H. sapiens* PDE7A NP\_002594.1, *M. musculus* PDE7 NP\_032828.1, *D. melanogaster* PDE8A AAM68263.1, *H. sapiens* PDE8B NP\_003710.1, *D. melanogaster* PDE9 (CG32648-PA) NP\_727644.1, *H. sapiens* PDE9A AF048837, *H. sapiens* PDE11A1 NP\_001070664.1, *H. sapiens* PDE11A2 NO00107826, *D. melanogaster* PDE11 (CG10231-PA) NP\_609885.1, *D. melanogaster* PDE11 XP\_001356584.1, *Trichomonas vaginalis* GAF-containing protein (GAF PDE outgroup) XP\_001324213.1.

**PDE6D alignment.** *Nematostella* PDE6pred XP\_001629547.1, *Homo* PDE6D NP\_002592.1, *Mus* PDE6D 032827.1, *Bos* PDE6D NP\_776845.1, *Canis* PDE6D NP\_001003156.1, *Ciona* PDE6D.NP\_001027639.1, *Apis* PDE6delta.XP\_394004.2, *Strongylocentrotus* PDE6delta.XP\_001177685.1, *Caenorhabditis* PDE6delta.NP\_495490.1, *Aedes* PDE6delta.XP\_320754.1, *Drosophila* GA21678-PA.XP\_001355815.1, *Tetrahymena* GMPPDE.XP\_001007775.1.

**Oca2 tree.** *H. sapiens* OCA2 NP\_000266.2, *Sus scrofa* OCA2 NP\_999259.2, *Oryzias latipes* OCA2 NP\_001098262, *M. musculus* OCA2 NP\_068679, *G. gallus* OCA2 XP\_425579, *Nematostella vectensis* \_OCA2XP\_001627452, *D. melanogaster* RE09889 (P protein) AAN71295.1, *Aedes aegypti* Tyr transp (hoepl-like) XP\_001658764.1, *D. melanogaster* Tyr\_transp (hoepl1) NP\_608876.1hoepl1, *Clostridium botulinum* Ars pump YP\_001253041.1, *Carboxydotherrmus hydrogeniformans* Ars transp YP\_360838.1, *Thermococcus kodakarensis* Ars pump.

**Membrane-associated guanylate cyclase tree.** *Strongylocentrotus* GC NP\_999705.1, *Asterias* GC BAB85468.1, *Xenopus* GC 2C NP\_001079334.1, *Mus* GC 2C NP\_659504.1, *Homo* GC 2C NP\_004954.1, *Xenopus* GC 2B NP\_001084176.1, *Anguilla* GC 2B P55202.1, *Homo* GC 2B P20594.1, *Mus* GC 2A P18293.2, *Aedes* retinal -type GC XP\_001658332.1, *Mus* GC 2E NP\_032218.2, *Homo* GC 2D NP\_000171.1, *Bos* GC 2D NP\_776973.1, *Canis* GC 2D NP\_001003207.1, *Gallus* GC 2E AAC24500.1, *Mus* GC 2D XP\_001474460.1, *Oryzias* Olgc-R1 NP\_001098133.1, *Danio* GC 2F XP\_689630.1, *Oryzias* OIGC5 NP\_001098551.1, *Oryzias* OIGC-R2 BAA76301.1, *Danio* GC 2 NP\_001103165.1, *Bos* GC 2F NP\_776974.1, *Homo* GC 2F NP\_001513.2, *Rattus* GC 2F NP\_446283.1, *Mus* GC 2F NP\_001007577.1. The last 80 amino acids of protein kinase-like domain of guanylate cyclases were aligned. Membrane guanylate cyclase of *Strongylocentrotus* and *Asterias* were used as an outgroup.

**Phosducin tree.** *Homo* PhLP3 NP\_076970.1, *Rattus* PhLP3 NP\_001020880.1, *Danio* PhLP3 46391102; *Nematostella* (protein ID) 119091, *Drosophila* AAF49974.2, *Mus* PhLP2 NP\_075997.1, *Homo* PhLP2 NP\_689614.2, *Bos* PhLP2 NP\_001035641.1, *Schizosaccharomyces* CAB39851.2, *Mus* PhL AAH06578.1, *Bos* PhL NP\_001035641.1, *Homo* PhL NP\_005379.3, *Danio* phosducin AAH60908.1, *Mus* phosducin Q9QW08.1, *Homo* phosducin NP\_002588.3, *Canis* phosducin NP\_001003076.1. Amino acid sequences spanning from helix 5 up to the end of helix 7 of phosducin protein family were aligned.

**Analysis by RT-PCR.** Total RNA was isolated from *Tripedalia cystophora* rhopalialia using TRIzol reagent (Invitrogen). The RT reaction was performed using random oligonucleotide hexamers in the presence or absence (negative control) of the PowerScript enzyme (Clontech). The specific primers for the phototransduction genes were as follows: *guanylate cyclase*, 5'-GGATGTCTACAGCTATGGCATCAT-3' (forward) and 5'-CGTTGATCTCTTTCATGACTTTCA-3' (reverse); inhibitory *PDE6D*, 5'-

TCTACCGTTAACGAAATGCAGCAC-3' (forward) and 5'-GTCTCGTATCAATCTGTACTTTGC-3' (reverse); catalytic *PDE*, 5'-GAGGACTATTCTCTGCATGCCCAT-3' (forward) and 5'-GTTCTTCTGACGGATAAGATCCA-3' (reverse); *phosducin*, 5'-CCAGCAATATCCACAGATCAA-3' (forward) and 5'-TCGAATCGGTTTCGCTATTCC-3' (reverse).

**Expression, Reconstitution, and Spectroscopic Analysis of *Tripedalia* c-Opsin.** The entire coding region was amplified from the *Tripedalia* c-opsin cDNA clone by primer pairs designed within the 5' and 3' edges of the coding regions with necessary sequences for cloning and translation purposes as in ref. 12: 5'-AAAAA-GAATTCACCATGGCAGATCACGGAAGGAATAC-3' (the forward primer with an EcoRI site underlined) and 5'-TTCTAGGTCTGACTCCGGCTCAACA-GAATTTCCACAGAG-3' (the reverse primer with a Sall site underlined). Via the restriction sites set in the primers, the amplified cDNA fragment was cloned into the pMT5 expression vector, which contains the last 15 amino acids of the bovine rod opsin necessary for immunoaffinity purification by 1D4 monoclonal antibody (13). Cultured COS-1 cells (RIKEN Cell Bank) were transfected with the pMT5-cDNA clone, incubated with 5  $\mu$ M 11-*cis*-retinal (Storm Eye Institute, Medical University of South Carolina, Charleston, SC), and solubilized with 1% dodecyl maltoside. The c-opsin photopigment was purified using immobilized 1D4 (Cell Culture Center, Minneapolis, MN). The UV-visible absorption spectrum was recorded for the c-opsin photopigment from 250 to 650 nm at 0.5-nm intervals using the Hitachi U3010 dual beam spectrometer at 20°C. Five replicates were performed in the dark and five more after 3 min of light exposure (with a <440 nm cut-off filter) as described in ref. 13. The Savitzky–Golay least-squares smoothing method was carried out for the absorbance curve, with 100 repetitions to eliminate spurious spikes. The  $\lambda_{\text{max}}$  value was taken from the dark–light difference spectrum.

1. Terakita A (2005) The opsins. *Genome Biol* 6:213.
2. Franke RR, Sakmar TP, Graham RM, Khorana HG (1992) Structure and function in rhodopsin: Studies of the interaction between the rhodopsin cytoplasmic domain and transducin. *J Biol Chem* 267:14767–14774.
3. Madabushi S, et al. (2004) Evolutionary trace of G protein-coupled receptors reveals clusters of residues that determine global and class-specific functions. *J Biol Chem* 279:8126–8132.
4. Arendt D, Tessmar-Raible K, Snyman H, Dorresteyn AW, Wittbrodt J (2004) Ciliary photoreceptors with a vertebrate-type opsin in an invertebrate brain. *Science* 306:869–871.
5. Florio SK, Prusti RK, Beavo JA (1996) Solubilization of membrane-bound rod phosphodiesterase by the rod phosphodiesterase recombinant delta subunit. *J Biol Chem* 271:24036–24047.
6. Bauer PH, et al. (1992) Phosducin is a protein kinase A-regulated G-protein regulator. *Nature* 358:73–76.
7. Sokolov M, et al. (2004) Phosducin facilitates light-driven transducin translocation in rod photoreceptors: Evidence from the phosducin knockout mouse. *J Biol Chem* 279:19149–19156.
8. Shyjan AW, de Sauvage FJ, Gillett NA, Goeddel DV, Lowe DG (1992) Molecular cloning of a retina-specific membrane guanylyl cyclase. *Neuron* 9:727–737.
9. Lowe DG, et al. (1995) Cloning and expression of a second photoreceptor-specific membrane retina guanylyl cyclase (RetGC), RetGC-2. *Proc Natl Acad Sci USA* 92:5535–5539.
10. Hallsson JH, Hafliadottir BS, Schepsky A, Arnheiter H, Steingrimsson E (2007) Evolutionary sequence comparison of the Mitf gene reveals novel conserved domains. *Pigment Cell Res* 20:185–200.
11. Edgar RC (2004) MUSCLE: Multiple sequence alignment with high accuracy and high throughput. *Nucleic Acids Res* 32:1792–1797.
12. Matsumoto Y, Fukamachi S, Mitani H, Kawamura S (2006) Functional characterization of visual opsin repertoire in Medaka (*Oryzias latipes*). *Gene* 371:268–278.
13. Kawamura S, Yokoyama S (1998) Functional characterization of visual and nonvisual pigments of American chameleon (*Anolis carolinensis*). *Vision Res* 38:37–44.





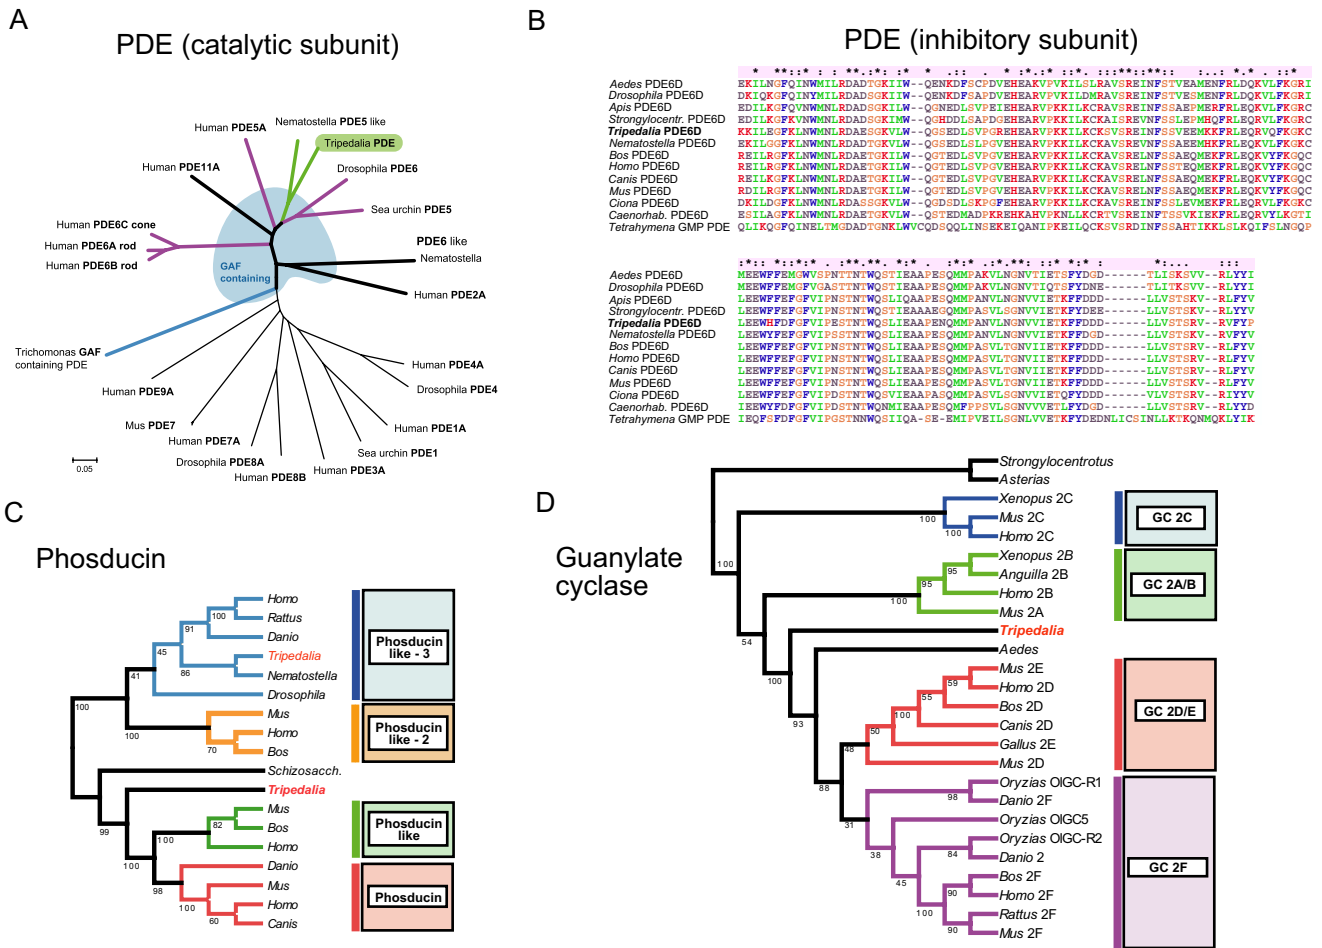

**Fig. S2.** Phylogenetic analysis of *Tripedalia* components of the ciliary phototransduction cascade. (A) Phylogenetic tree of the catalytic subunit of the *phosphodiesterase* (*PDE*) gene family. *Tripedalia* PDE contains two GAF domains and a phosphodiesterase catalytic domain, PDase I. *Tripedalia* PDE groups with cGMP-specific PDEs used in phototransduction and is phylogenetically close to PDE5 and PDE6. (B) Alignment of the inhibitory subunit of *phosphodiesterase PDE6D*. A  $\delta$  subunit of PDE (PDE6D) in the rod outer segment can bind the PDE $\alpha\beta\gamma_2$  complex and solubilize it, disrupting its normally close association with the disk membrane (5). Among bilaterians, the highest degree of sequence identity/similarity of *Tripedalia* PDE6D is with PDE6D from various vertebrates. The percentage of identity/similarity between *Tripedalia* and other species is as follows: *Homo* (82/94%), *Bos* (82/94%), *Canis* (82/95%), *Mus* (81/94%), *Ciona* (80/91%), *Strongylocentrotus* (74/92%), *Caenorhabditis* (69/89%), *Aedes* (62/84%), and *Drosophila* (59/82%). (C) Phylogenetic tree of the *phosducin* gene family. *Phosducin* modulates phototransduction by interacting with the  $\beta\gamma$  subunits of G protein transducin (6, 7). *Phosducin* and *phosducin-like* genes are expressed in *Tripedalia*, the former clustering with the vertebrate retina-specific *phosducins*. (D) Phylogenetic tree of the *guanylate cyclase* (*GC*) gene family. *Tripedalia* guanylate cyclase clusters with membrane-associated retina-specific GC2E (also known as retGC-1) and GC2F (also known as retGC-2), both of which are expressed in vertebrate rods and cones (8, 9). These specialized photoreceptor guanylate cyclases in outer segments of rods and cones resynthesize cGMP that is rapidly depleted through activated PDE upon light stimulus.

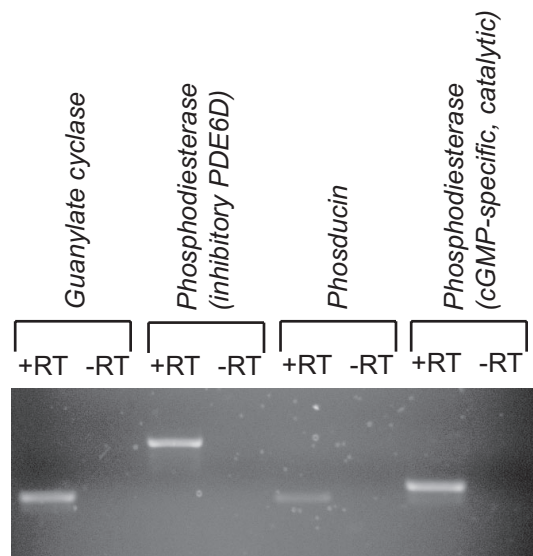

**Fig. S3.** Expression analysis of ciliary phototransduction cascade genes. RT-PCR analysis of *guanylate cyclase*, *phosphodiesterases*, and *phosducin* gene expression in rhopalia of *T. cystophora*. In all cases, no PCR product was obtained in the absence of reverse transcriptase (–RT).

A

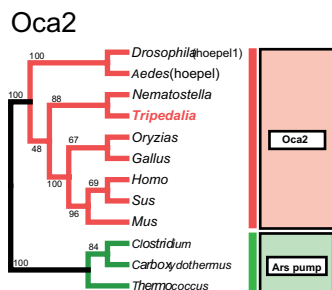

B

Mitf/Tfe

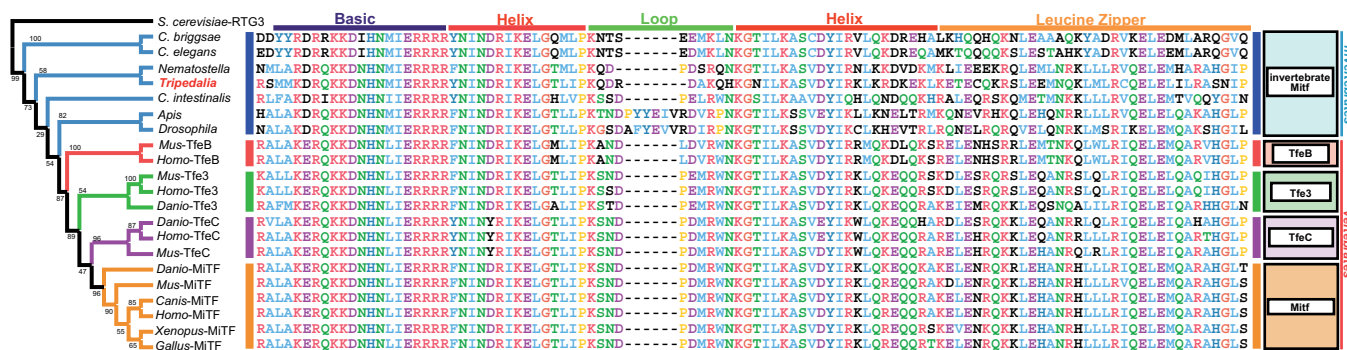

**Fig. S4.** Phylogenetic analysis of melanogenic pathway-specific genes. (A) Phylogenetic tree of the *Oca2* gene family. *Oca2* proteins (also known as P protein, P permease, or hoepel) from different organisms and protein sequences of three arsenic pumps (closest homologues to *Oca2* family) were aligned, and conserved transmembrane helices were used for phylogenetic analysis. The tree was inferred by the neighbor-joining method using arsenic pumps as outgroup sequences. The numbers above and under the branches indicate bootstrap support (1,000 replicates). (B) Alignment and phylogenetic tree of the *Mitf/Tfe* gene family. The phylogenetic tree was inferred by the neighbor-joining method using *Saccharomyces cerevisiae* RTG3 as an outgroup sequence. Colored bars above the alignment demarcate the secondary structure motifs (according to ref. 10). *Caenorhabditis* sequences form an outgroup probably because of the high level of diversification.
